# Supplementary material for: On the formation of biogenic secondary organic aerosol in chemical transport models: an evaluation of the WRF-CHIMERE (v2020r2) model with a focus over the Finnish boreal forest
Source: Copernicus journal article supplement (doi:10.5194/gmd-17-545-2024), 2024-01-24
Supplement: Supplementary file 1 [file gmd-17-545-2024-supplement.pdf]

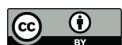

*Supplement of*

**On the formation of biogenic secondary organic aerosol in chemical transport models: an evaluation of the WRF-CHIMERE (v2020r2) model with a focus over the Finnish boreal forest**

**Giancarlo Ciarelli et al.**

*Correspondence to:* Giancarlo Ciarelli ([giancarlo.ciarelli@helsinki.fi](mailto:giancarlo.ciarelli@helsinki.fi))

The copyright of individual parts of the supplement might differ from the article licence.

Supplement

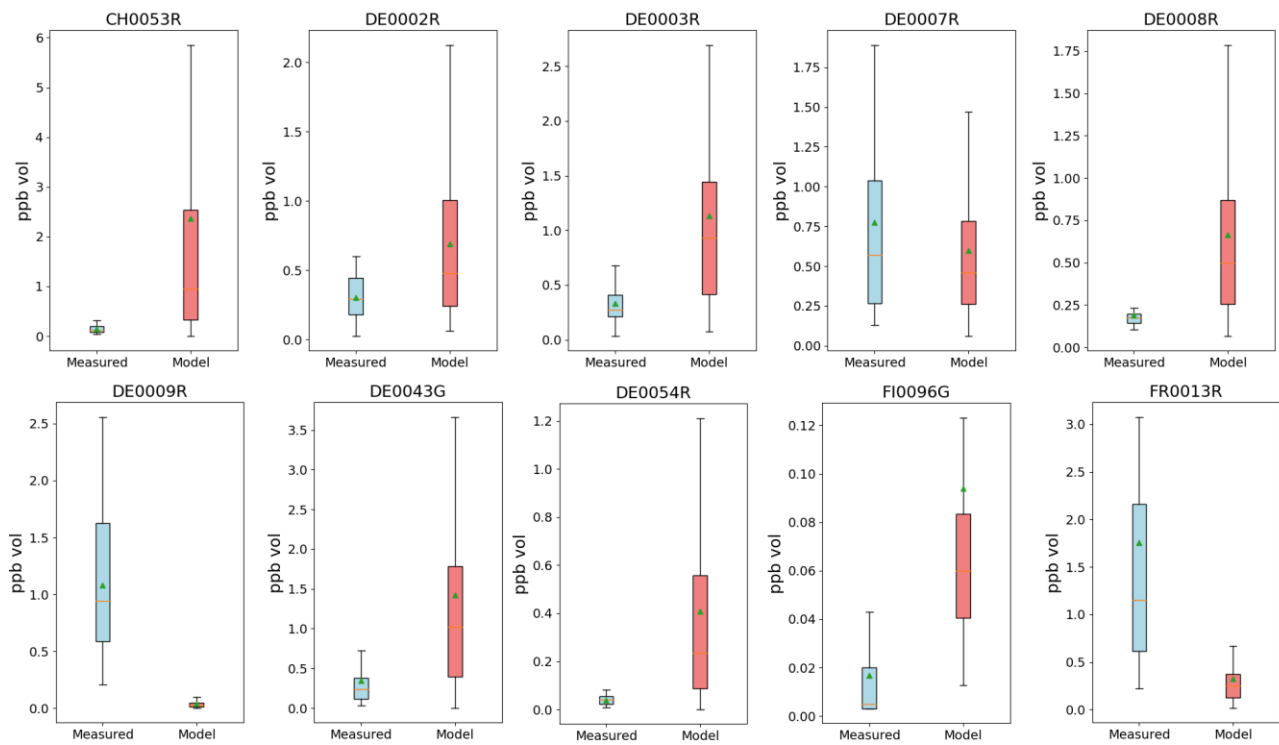

**Figure S1: Comparisons of modeled (red) and measured (blue) air concentrations of isoprene as available from the EBAS database.**  
5 **Measurement time resolution varies from is 1 hours to 4 days depending on the specific station. Units are in ppb vol.**

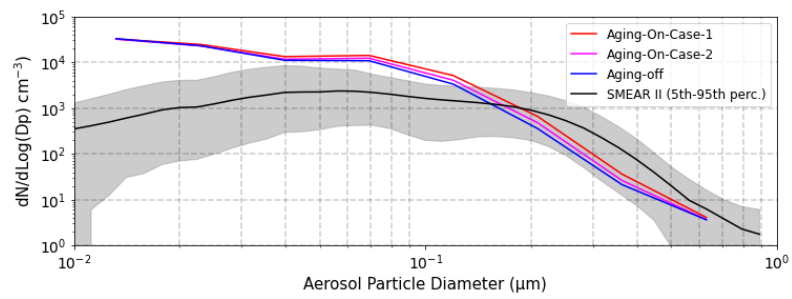

10 **Figure S2: Measured (black) and modelled (various colors) median size distribution comparison at the SMEAR-II stations. The shaded areas indicated the 5<sup>th</sup> and 95<sup>th</sup> interquartile range.**

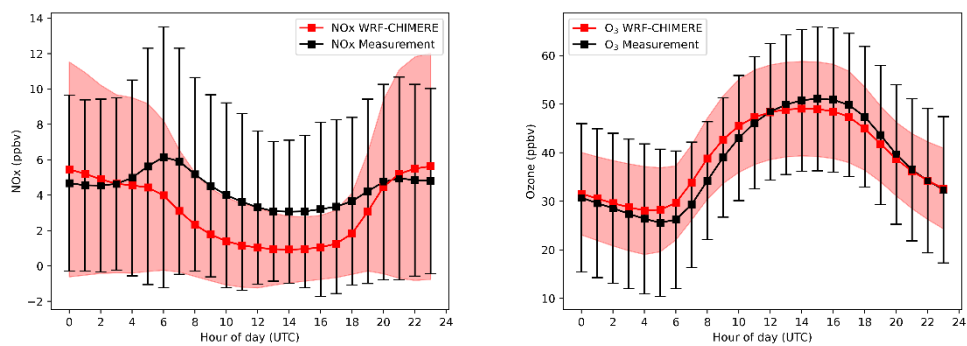

**Figure S3: Diurnal variation of O<sub>3</sub> and NO<sub>x</sub> at available Air Quality e-Reporting rural sites (from 15 June until 30 August of 2019). Number of stations are 271 for NO<sub>x</sub> and 350 for O<sub>3</sub>. The extent of the bars and the shaded areas denotes the one standard deviation (1σ). Measurements data are shown in in black and model data in red. Units are in ppb vol.**

**Table S1: Mass SOA yields for each SOA precursors used in the VBS version of CHIMERE. Yields are applied to all oxidants, i.e., O3, NO3, and OH. For isoprene, only oxidation by OH are considered for BSOA formation. The differentiation between low-NOx and high-NOx yield is based on the approached proposed by Cholakian et al., 2018.**

20

| SOA<br>precursors | Mass yield of each bin |        |        |        |
|-------------------|------------------------|--------|--------|--------|
| C* (µg m3)        | 1                      | 10     | 100    | 1000   |
| ALK4              | 0.0                    | 0.075  | 0.0    | 0.0    |
| ALK5              | 0.0                    | 0.300  | 0.0    | 0.0    |
| OLE1              | 0.0045                 | 0.009  | 0.060  | 0.225  |
| OLE2              | 0.0225                 | 0.435  | 0.129  | 0.375  |
| ARO1              | 0.075                  | 0.225  | 0.375  | 0.525  |
| ARO2              | 0.075                  | 0.300  | 0.375  | 0.525  |
| TERP              | 0.1073                 | 0.0918 | 0.3587 | 0.6075 |
| ISOP              | 0.009                  | 0.03   | 0.015  | 0.000  |
| SQT               | 0.0750                 | 0.1500 | 0.7500 | 0.9000 |

**Table S2: EBAS stations (from <https://ebas.nilu.no/>) used for the organic carbon (OC) comparison on the coarse resolution grid (30km).**

| Site    | Latitude (deg) | Longitude (deg) |
|---------|----------------|-----------------|
| CZ0003R | 49.5734        | 15.0803         |
| DE002R  | 52.8022        | 10.7594         |
| DE003R  | 47.9147        | 7.9086          |
| DE0007R | 53.1667        | 13.0333         |
| DE0008R | 50.6500        | 10.7667         |
| DE0009R | 54.4368        | 12.7249         |
| DE0044R | 51.5255        | 12.9277         |
| FR0008R | 48.5000        | 7.1333          |
| FR0009R | 49.9000        | 4.6333          |
| FR0013R | 43.6167        | 0.1833          |
| FR0022R | 48.5622        | 5.5056          |
| FR0023R | 44.5694        | 5.2790          |
| FR0024R | 47.8319        | -1.8363         |
| FR0025R | 46.8147        | 2.6100          |
| NO0002R | 58.3885        | 8.2520          |
| NO0039R | 62.7833        | 8.8833          |
| NO0056R | 60.3724        | 11.0781         |
| PL0005R | 54.1500        | 22.0667         |
| PL0009R | 53.6621        | 17.9340         |

**Table S3: EBAS stations (from <https://ebas.nilu.no/>) used for the isoprene air concentration comparison on the coarse resolution grid (30km).**

| Site    | Latitude (deg) | Longitude (deg) |
|---------|----------------|-----------------|
| CH0053R | 47.1896        | 8.1754          |
| DE0002R | 52.8022        | 10.7594         |
| DE0003R | 47,9147        | 7,9086          |
| DE0007R | 53.1666        | 13.0333         |
| DE0008R | 50.6500        | 10.7666         |
| DE0009R | 54.4368        | 12.7249         |
| DE0043G | 47.8014        | 11.0096         |
| DE0054R | 47.4165        | 10.9796         |
| FI0096G | 67.9733        | 24.1161         |
| FR0013R | 43.6166        | 0.1833          |

30

**Table S4: Model evaluation for organic carbon (OC) as predicted by the three BSOA schemes at the EBAS stations (from <https://ebas.nilu.no/>)**

| Variable                                 | Mean | MB    | MGE  | RMSE | MFB   | MFE  |
|------------------------------------------|------|-------|------|------|-------|------|
| Aging-On-Case-1 ( $\mu\text{g m}^{-3}$ ) | 3    | 0.63  | 1.84 | 2.88 | 0.56  | 1.65 |
| Aging-On-Case-2 ( $\mu\text{g m}^{-3}$ ) | 2.4  | -0.13 | 1.52 | 1.52 | -0.08 | 1.37 |
| Aging-Off ( $\mu\text{g m}^{-3}$ )       | 1.3  | -1.1  | 1.34 | 1.68 | -0.86 | 1.16 |
| Obs ( $\mu\text{g m}^{-3}$ )             | 2.4  | -     | -    | -    | -     | -    |

**35 Table S5: Model evaluation for O<sub>3</sub> and NO<sub>x</sub> concentrations against measurements from the Air Quality e-Reporting rural sites. Number of stations are 271 for NO<sub>x</sub> and 350 for O<sub>3</sub>.**

| Variable              | Mean measurements | Mean model | MB   | MGE  | r (-) |
|-----------------------|-------------------|------------|------|------|-------|
| O <sub>3</sub> (ppb)  | 38.4              | 39.5       | 1.05 | 7.38 | 0.55  |
| NO <sub>x</sub> (ppb) | 4.4               | 2.5        | -1.8 | 2.5  | 0.45  |
